# Supplementary material for: Partial MCM4 deficiency in patients with growth retardation, adrenal insufficiency, and natural killer cell deficiency
Source: JCI journal article supplement (doi:10.1172/jci61014), 2012-02-22
Supplement: sd1 [file 1]

## **Supplemental Methods**

### **Linkage analysis**

A linkage analysis for Kindred A has been published elsewhere (15). For Kindred B, we extracted genomic DNA from cell lines or blood samples from patient P2.1 and both parents. For these individuals, we genotyped the microsatellites from D8S1722 to D8S1833 (17 microsatellites in and around the previously reported region). Multipoint Lod scores were calculated with MERLIN software (<http://www.sph.umich.edu/csg/abecasis/merlin/index.html>), assuming that the gene responsible for the defect was autosomal recessive and displayed full penetrance.

### **Cell purification and culture**

Fresh human peripheral blood mononuclear cells (PBMCs) were isolated by Ficoll-Hypaque density gradient centrifugation (Amersham Pharmacia Biotech, Sweden) from heparin-treated whole-blood samples obtained from patients or healthy volunteers.

EBV-B cells were obtained by immortalizing PBMCs with Epstein-Barr virus and culturing them in complete RPMI 1640 medium (Gibco BRL, Invitrogen, USA) supplemented with 10% heat-inactivated fetal calf serum (FCS) (Gibco BRL, Invitrogen, USA).

Primary human fibroblasts were obtained from skin biopsy specimens from patients or healthy controls and were cultured in DMEM (Gibco BRL, Invitrogen, USA) supplemented with 10% fetal calf serum (FCS) (Gibco BRL, Invitrogen, USA). They were then transformed with SV40-large T antigen vector, to obtain immortalized SV40-fibroblast cell lines.

Polymorphonuclear leukocytes (PMNs) were prepared from heparin-treated blood from patients and healthy controls. Peripheral blood was subjected to dextran sedimentation

and the buffy coat was centrifuged through Ficoll-Hypaque (Amersham Pharmacia Biotech, Sweden). The remaining red blood cells were removed by hypotonic shock.

B cells, monocytes, T cells and NK cells were isolated from peripheral PBMCs by positive immunomagnetic depletion, with antibodies against CD19, CD14, CD3 and CD56 (Macs; Miltenyi Biotec, Germany), respectively, according to the kit manufacturer's instructions. The preparations of B cells, monocytes, T cells and NK cells were >90%, >80%, >70% and >90% pure, respectively (flow cytometry, not shown).

Monocyte-derived dendritic cells (MDDCs) were obtained from purified monocytes cultured in the presence of GM-CSF (50 ng/ml; R&D Systems, USA) and IL-4 (10 ng/ml; R&D Systems, USA). We plated  $2 \times 10^6$  monocytes in complete RPMI 1640 medium (RPMI medium supplemented with 10% heat-inactivated pooled FBS (Gibco BRL, Invitrogen, USA)) in 20 cm<sup>2</sup> flasks and incubated them at 37°C under an atmosphere containing 5% CO<sub>2</sub>; the medium was replaced every two days during the 10-day culture period.

Monocyte-derived macrophage cells (MDMs) were obtained from purified monocytes cultured in the presence of M-CSF (50 ng/ml; R&D Systems, USA). We plated  $2 \times 10^6$  monocytes in complete RPMI 1640 medium (RPMI medium supplemented with 10% heat-inactivated pooled FCS), in 100 x 20 mm tissue culture dishes, and incubated them at 37°C under an atmosphere containing 5% CO<sub>2</sub>; the medium was replaced every 5 days during the 15-day culture period.

### **DNA, RNA, PCR, sequencing and sequence alignment**

Genomic DNA was purified from EBV-B cells or SV40 fibroblasts, by phenol/chloroform extraction. Total RNA was extracted from EBV-B cells from P1.2 and controls, and from SV40-fibroblasts of P2.1 and controls, with Trizol (Invitrogen, USA). The RNA was reverse-transcribed with SuperScript<sup>TM</sup> II Reverse Transcriptase (Invitrogen, USA),

according to the manufacturer's instructions. *MCM4* cDNA was amplified with two pairs of primers: Pair 1 (-183Forward: CCAGGTGGACTCGGAGTCC/+1560Reverse: CGAGGTTGTACACGTACTIONTGC) and Pair 2 (+1380Forward: GAGGCTTGCTTCAGCCTTGG/+3228Reverse: CCATAAGCATACTGATGATGGC). The sequences of the primers used for the PCR amplification of exons and cDNA for all genes in the candidate region are available upon request. PCR was performed with *Taq* polymerase (Invitrogen, USA). The products were sequenced with the Big Dye Terminator cycle sequencing kit and analyzed on a 3130 ABI Prism Genetic Analyzer (Applied Biosystems, USA). The *MCM4* sequences from *Ensembl* were aligned, with the CLUSTALW2 multiple sequence alignment tool.

#### **Determination of mRNA levels by quantitative real-time RT-PCR**

Total RNA was extracted from cells with Trizol reagent (Invitrogen, USA). Each RNA preparation was reverse transcribed directly with the High Capacity RNA-to-cDNA kit (Applied Biosystems, USA), after purification with the RNeasy plus Micro Kit (Qiagen, Germany) according to the manufacturer's instructions, to determine *MCM4* transcript levels (Hs00381539\_m1, Applied Biosystems, USA). Quantitative real-time PCR (qPCR) was performed in an ABI PRISM® 7700 Sequence Detection System (Applied Biosystems, USA). The PCR program was as follows: 95°C for 20 seconds and then 40 cycles of 95°C for 3 seconds and 60°C for 1 minute. The results were normalized with respect to values for transcripts of the housekeeping gene encoding  $\beta$ -glucuronidase (GUS). Results are expressed according to the  $\Delta$ Ct method, as described by the kit manufacturer.

### **siRNA transfection**

SV40-fibroblasts from P2.1 and healthy controls were transfected with 3 different siRNAs (si793 (GCAUUGAAGACUAAGAAUA), si1299 (UGAAGAAGCAGAACAGAAA) and si1325 (CAGAGAAACGUGUGGAAUU)) directed against MCM4 (from Dharmacon), and negative control siRNAs directed against luciferase (GL3) and Epstein-Barr virus nuclear antigen (EBNA) (from Dharmacon). Cells were lysed and analyzed 48 hours after transfection.

## **Supplemental Table legends**

**Supplemental Table 1** Details of the intra- and extrauterine growth retardation and adrenal insufficiency phenotypes of patients. Full-face and profile images of P1.1, P1.2 and P1.3 are shown.

**Supplemental Table 2** Detailed chromosomal aberrations of primary and SV40-fibroblast cells in P1.3 and P2.1. Comparison with controls, in the presence or absence of APH treatment. Detailed descriptions of the chromosomal aberrations in cells transduced with lentiviral particles containing empty, WT *MCM4* or mutated *MCM4* allele vectors.

**Supplemental Table 3** Detailed chromosomal aberrations in lymphocytes. Chromosomal aberrations, with the number of normal cells, and numbers of gaps, breaks and exchanges in total cells and in control cells included in the same experiment, after treatment with DEB, MMC and HN2.

## Supplemental Figure legends

**Supplemental Figure 1** (A) Table of all variants (other than the causal *MCM4* variant) identified in the coding region, splicing site and the 5' and 3'UTRs of all coding genes and one miRNA located in the centromeric region of chromosome 8. (B) Amplification of the *MCM4* cDNA as two fragments. Schematic diagram of the *MCM4* cDNA, showing the binding sites of the primers and the size of the amplification products. Amplification of the *MCM4* cDNA from SV40 fibroblasts with various primer pairs for controls and patients. (C) Relative quantification of *MCM4* mRNA in EBV-B cells from P1.2, family members (n=7, 2 WT/WT, 5 WT/c.71-2A>G) and controls (n=2) and SV40-fibroblasts and primary fibroblasts from P1.3, P2.1 and controls (n=2). We used only probes specific for *MCM4* mRNA. GUS was used as endogenous gene for comparison. The ratio of *MCM4* to GUS mRNA levels is shown. Error bars indicate the standard deviation. (D) MCM4 was detected with a polyclonal antibody, at a size of 100 kDa, in total extracts of EBV-B cells from P1.2, WT/WT family members (n=2), WT/c.71-2A>G family members (n=6) and controls (n=2). An antibody against GAPDH was used as a protein loading control.

**Supplemental Figure 2** (A) MCM4 protein production in SV40-fibroblasts from controls, P1.3 and P2.1 was assessed by western blotting with a polyclonal antibody against either the N-terminal domain or the C-terminal domain of MCM4 and a polyclonal antibody against the first 300 amino acids of the MCM4 protein.  $\beta$ -actin antibody was used as a protein loading control. (B) MCM4 protein levels after transient transfection with 3 different siRNAs against MCM4 in primary and SV40-fibroblasts from controls and P1.3 assessed by western blotting. Transient transfection with the control siRNAs (EBNA and GL3) was used as a negative control. Total protein extracts from controls and P1.3 primary and SV40-fibroblasts were used

as a positive control for the antibody.  $\alpha$ -Tubulin antibody was used as a loading control. (C) Cell cycle of SV40-fibroblasts from controls and patients after treatment with 0.3  $\mu$ M Aph. Representative flow cytometry plots. Control (left), P1.3 (middle) and P2.1 (right) after Aph treatment. P1 corresponds to normal G1 phase, P2+P3+P4 correspond to normal S phase, P5 corresponds to normal G2 phase plus abnormal G1 or failed mitosis, P6+P7 correspond to re-replication S phase and P8 corresponds to 8C DNA content. The patients' SV40-fibroblasts had a lower proportion of BrdU-positive cells at S phase than the control cells (D) Representative spreads of chromosome breaks induced in the presence or absence of APH. A P2.1 metaphase with some aberrations indicated by arrows (left) and a P2.1 metaphase with aphidicolin-induced breaks indicated by arrows (right). The number of chromosome breaks (mean) per metaphase in P1.3 and P2.1 primary fibroblasts was not significantly different from that in control primary fibroblasts. Error bars indicate SEM.

**Supplemental Figure 3** The N-terminal domain of the MCM4 protein in humans and the corresponding region in 45 other eukaryotic species. Conservation of the first 83 amino acids of the MCM4 protein, with the position of the three ATG codons in frame.

**Supplemental Figure 4** Hematopoietic cell phenotypes in humans and mice (A) Flow cytometry for lymphocyte subsets: B cells, T cells (CD3+, CD3+CD4+, CD3+CD8+) and NK cells were detected in the peripheral blood of controls and patients (P1.1, P1.2, P1.3 P1.4, P1.5 and P2.1). Horizontal bars represent medians. (B) Flow cytometry for monocyte subsets: CD14+, CD16+, CD14/16+ and PDCsBDCA2+ and MDCsBDCA1+ cells were detected in the peripheral blood of controls of various age groups (5 to 10 y, 10 to 15 y and >15 y), heterozygous subjects and homozygous patients (P1.1, P1.2 and P1.3). Error bars for the controls indicate the standard deviation. (C) MCM4 was detected with a polyclonal antibody,

at a size of 100 kDa, in cell subsets from blood (PBLs, PMNs, T cells, B cells, NK cells, monocytes, MDDCs and macrophages), EBV-B cells, primary and SV40 fibroblast cells from a control individual. An antibody against  $\alpha$ -tubulin was used as a loading control. This result is representative of 3 independent experiments). **(D)** NK cell percentage in WT/WT, *Chaos3*/WT, *Chaos3*/*Chaos3* mice. The percentage of NK cells is significantly lower in *Chaos3*/*Chaos3* (n=11) than in WT/WT (n=25) mice ( $P < 0.05$  indicated by \*, non parametric Wilcoxon test). Horizontal bars indicate the means. The percentage of B cells is significantly higher in *Chaos3*/*Chaos3* (n=11) than in WT/WT (n=25) mice ( $P < 0.005$  indicated by \*\*, non parametric Wilcoxon test). A significant difference in the percentage of T cells was observed between WT/WT (n=19) and *Chaos3*/*Chaos3* (n=11) mice ( $P < 0.05$  indicated by \*, non parametric Wilcoxon test).

**Supplemental Figure 5** T-cell phenotypes and stimulation responses **(A)** Percentage of different T- and B-cell subsets in whole-blood samples from healthy siblings either homozygous WT or heterozygous, and patients. **(B)** Proliferation of PBMCs determined by thymidine incorporation from healthy homozygous WT or heterozygous siblings and patients were not stimulated (medium) or were stimulated with PHA (2.5 mg/ml) over 3 days. **(C)** Apoptosis of PHA-activated T-cell blasts from a control, P1.2 and P1.3 was assessed by determining propidium iodide staining in the presence or absence of stimulation with various doses of IL-2 or IL-15 over 3 days. **(D)** Flow cytometry counts of CD3+Perforin+ T cells for controls (n=6), heterozygous siblings (n=2) and patients (P1.1, P1.2 and P1.3). Horizontal bars indicate medians. A non significant difference ( $P > 0.05$ ) is indicated by “ns”.



**Supplemental Figure 6** Homozygous *MCM4* mutation and specific NK CD56dim deficiency. **(A)** Flow cytometry counts of CD56+ NK cells that were also CD16+, for controls (n=17), heterozygous siblings (n=2) and patients (P1.1, P1.2 and P1.3), Perforin+ for controls (n=6), heterozygous siblings (n=2) and patients (P1.1, P1.2 and P1.3) and CD57+ for controls (n=8) and patient P1.3. Horizontal bars indicate medians. A significant  $P < 0.05$  is indicated by \*, a  $P < 0.005$  is indicated by \*\* and a  $P < 0.0005$  by \*\*\*, in Student's *t*-test. **(B)** MCM4 was detected with a polyclonal antibody, at a size of 100 kDa, in nuclear extract from the CD56bright and CD56dim NK cell subsets of control blood. An antibody against  $\beta$ -actin was used as a protein loading control. The ratio of MCM4 to  $\beta$ -actin protein levels is shown for 3 independent controls from independent experiments. Error bars indicate the standard deviation. **(C)** Flow cytometry counts of the two subsets of CD56 NK cells expressing CD94 in controls (n=11), heterozygous siblings (n=2) and patients (P1.1, P1.2 and P1.3). Horizontal bars indicate medians.  $P < 0.05$  is indicated by \*, a  $P < 0.005$  is indicated by \*\* and a non significant difference ( $P > 0.05$ ) by "ns". Representative flow cytometry plots of a homozygous WT sibling, a heterozygous sibling and one patient. **(D)** PBMCs from healthy controls (n=6) and from one patient (P1.3) tested in two independent experiments were stained with CFSE and stimulated for 72 h with various doses of IL-15. Apoptosis was assessed on NK subsets, by 7AAD staining. Error bars indicate the standard deviation.

| Patients | Delivery Date (weeks) | Delivery type (v=vaginal, CS=Cesarean section) | Sex (F=Female, M=Male) | Intrauterine Growth Retardation |                               |                                           | Extrauterine Growth Retardation |                           |                                     | Developmental delay                | Adrenal insufficiency         |                                   |                                                             |
|----------|-----------------------|------------------------------------------------|------------------------|---------------------------------|-------------------------------|-------------------------------------------|---------------------------------|---------------------------|-------------------------------------|------------------------------------|-------------------------------|-----------------------------------|-------------------------------------------------------------|
|          |                       |                                                |                        | Birth Weight (kg, percentile)   | Birth Height (cm, percentile) | Birth Head Circumference (cm, percentile) | Weight (kg, percentile)         | Height (cm, percentile)   | Head circumference (cm, percentile) |                                    | 9 am Cortisol (nmol/l) NR>200 | ACTH at diagnosis (ng/l) 9<NR< 52 | Maximum cortisol concentration with ACTH stimulation NR>550 |
| P1.1     | 38 +4days             | V                                              | M                      | 2.41 (<3rd)                     | 46 (<3rd)                     | 32.4 (3rd)                                | 22.4 (3rd) at 10years           | 123 (<3rd) at 10 years    | NA (<3rd) at 1.1years               | Mild cognitive developmental delay | NA                            | NA                                | NA                                                          |
| P1.2     | 37                    | CS                                             | F                      | 1.64 (<3rd)                     | 44 (<3rd)                     | 33 (3rd)                                  | 31.8 (<3rd) at 17.4years        | 142.5 (<3rd) at 17.4years | 51 (normal) at 17.4years            | Normal IQ                          | <28                           | <10                               | <28                                                         |
| P1.3     | 34                    | CS                                             | M                      | 1.8 (<3rd)                      | 45 (<3rd)                     | 30.6 (<3rd)                               | 21.8 (<3rd) at 12.7years        | 126.6 (<3rd) at 12.7years | 49.5 (<3rd) at 12.7 years           | Mild cognitive developmental delay | 92                            | >2000                             | 88                                                          |
| P1.4     | 38                    | CS                                             | M                      | 2.3 (<3rd)                      | 46 (<3rd)                     | 30.6 (3rd)                                | 31.9 (75 centile) at 10years    | 111.9 (3rd) at 7.1years   | NA                                  | Mild cognitive developmental delay | 244                           | NA                                | 192                                                         |
| P1.5     | 40 +5days             | CS                                             | F                      | 2.5 (<3rd)                      | 47 (<3rd)                     | 33.5 (3rd)                                | 13.6 (<3rd) at 5.5years         | 98 (<3rd) at 5.5 years    | 48.5 (<3rd) at 3.8 years            | Mild cognitive developmental delay | 215                           | >1250 (323)                       | 151                                                         |
| P2.1     | 40                    | CS                                             | M                      | 2.2 (<3rd)                      | 44 (<3rd)                     | 34 (normal)                               | 34.2 (<3rd) at 17.9years        | 158 (<3rd) at 17.6years   | NA                                  | Mild cognitive developmental delay | 30                            | 532                               | 32                                                          |

P1.1

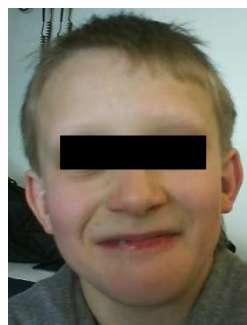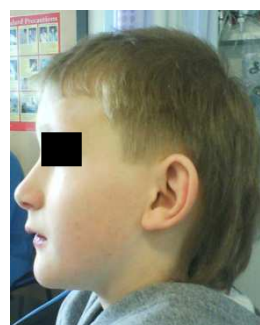

P1.2

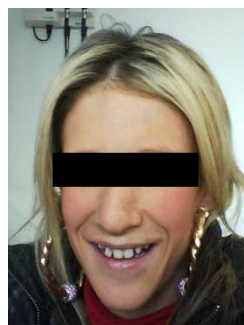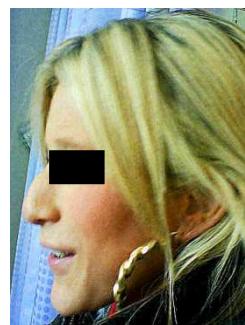

P1.3

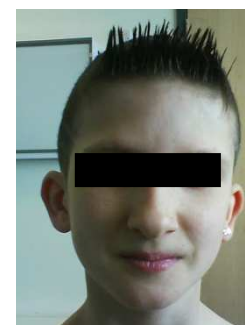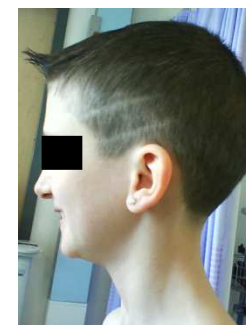

NA: Not available NR: Normal Range

**Supplemental Table 1** Details of the intra- and extrauterine growth retardation and adrenal insufficiency phenotypes of patients. Full-face and profile images of P1.1, P1.2 and P1.3 are shown.

| Sample              | Cell Type | Drug | Concentration of Drug | Total Metaphases Studied | Total Breaks (ctb, rad*) | Total Chromatid Breaks (ctb*) | Total Tri-radials | Total Quadri-radials | Metaphases with Breaks | Metaphases with Multiple Breaks | Breaks per Metaphase |
|---------------------|-----------|------|-----------------------|--------------------------|--------------------------|-------------------------------|-------------------|----------------------|------------------------|---------------------------------|----------------------|
| Control             | Primary   | None | -                     | 50                       | 0                        | 0                             | 0                 | 0                    | 0                      | 0                               | 0                    |
| P1.3                | Primary   | None | -                     | 50                       | 0                        | 0                             | 0                 | 0                    | 0                      | 0                               | 0                    |
| P2.1                | Primary   | None | -                     | 26                       | 1                        | 1                             | 0                 | 0                    | 1                      | 0                               | 0.04                 |
| Control             | Primary   | APH  | 0.3 $\mu$ M           | 50                       | 16                       | 16                            | 0                 | 0                    | 12                     | 4                               | 0.32                 |
| P1.3                | Primary   | APH  | 0.3 $\mu$ M           | 57                       | 42                       | 36                            | 1                 | 2                    | 28                     | 9                               | 0.74                 |
| P2.1                | Primary   | APH  | 0.3 $\mu$ M           | 28                       | 9                        | 9                             | 0                 | 0                    | 7                      | 2                               | 0.32                 |
| Control             | SV40      | None | -                     | 54                       | 0                        | 0                             | 0                 | 0                    | 0                      | 0                               | 0                    |
| P1.3                | SV40      | None | -                     | 45                       | 10                       | 8                             | 0                 | 1                    | 4                      | 4                               | 0.22                 |
| P2.1                | SV40      | None | -                     | 34                       | 6                        | 2                             | 1                 | 1                    | 3                      | 1                               | 0.18                 |
| Control             | SV40      | APH  | 0.3 $\mu$ M           | 45**                     | 37                       | 29                            | 1                 | 3                    | 16                     | 7                               | 0.82                 |
| P1.3                | SV40      | APH  | 0.3 $\mu$ M           | 24***                    | 259                      | 233                           | 9                 | 4                    | 24                     | 22                              | 10.79                |
| P2.1                | SV40      | APH  | 0.3 $\mu$ M           | 10                       | 69                       | 61                            | 2                 | 2                    | 9                      | 9                               | 6.9                  |
| P1.3 + empty vector | SV40      | APH  | 0.3 $\mu$ M           | 20                       | 194                      | 172                           | 5                 | 6                    | 17                     | 14                              | 9.7                  |
| P1.3 + MCM4wt       | SV40      | APH  | 0.3 $\mu$ M           | 50                       | 180                      | 140                           | 16                | 4                    | 33                     | 27                              | 3.6                  |
| P1.3 + MCM4mut      | SV40      | APH  | 0.3 $\mu$ M           | 30****                   | 292                      | 258                           | 9                 | 8                    | 26                     | 25                              | 9.73                 |

Ctb: chromatid break, rad: radial, \*\* 2 metaphases with significant damage (rad +ctb) were included in analysis, \*\*\* 2 metaphases with severe damage were not included in the analysis, \*\*\*\* 4 metaphases with severe damage were not included in the analysis.

**Supplemental Table 2** Detailed chromosomal aberrations of primary and SV40-fibroblast cells in P1.3 and P2.1. Comparison with controls, in the presence or absence of APH treatment. Detailed descriptions of the chromosomal aberrations in cells transduced with lentiviral particles containing empty, WT *MCM4* or mutated *MCM4* allele vectors.

| Drug <sup>a</sup>                                 | Control Associated with P1.1                                                                  | P1.1                                                         | Control Associated with P1.2                               | P1.2                                                                    | Control Associated with P1.3                              | P1.3                                                        | Control Associated with P1.4                                 | P1.4                                                           | Control Associated with P2.1                              | P2.1                                                        |
|---------------------------------------------------|-----------------------------------------------------------------------------------------------|--------------------------------------------------------------|------------------------------------------------------------|-------------------------------------------------------------------------|-----------------------------------------------------------|-------------------------------------------------------------|--------------------------------------------------------------|----------------------------------------------------------------|-----------------------------------------------------------|-------------------------------------------------------------|
| <b>DEB</b><br>(0.1µg/ml) <sup>b</sup>             | 79/80 cells <sup>c</sup><br>normal<br>1 gap<br>0 break<br>0 exchanges                         | 60/80 cells*<br>normal<br>9 gaps<br>10 breaks<br>4 exchanges | 35/40 cells<br>normal<br>4 gaps<br>1 break<br>1 exchange   | 26/40 cells*<br>normal<br>5 gaps<br>13 breaks<br>10 exchanges           | ND <sup>e</sup>                                           | ND <sup>e</sup>                                             | 39/40 cells<br>normal<br>1 gap<br>0 break<br>0 exchanges     | 25/40 cells*<br>normal<br>7 gaps<br>7 breaks<br>4 exchanges    | ND <sup>e</sup>                                           | ND <sup>e</sup>                                             |
|                                                   |                                                                                               |                                                              | 73/80 cells<br>normal<br>5 gaps<br>2 breaks<br>0 exchanges | 68/80 cells*<br>normal<br>5 gaps<br>9 breaks<br>1 exchange              |                                                           |                                                             |                                                              |                                                                |                                                           |                                                             |
| <b>MMC</b><br>(6x10 <sup>-8</sup> M) <sup>b</sup> | Reported abnormal <sup>d</sup><br>in clinical test for patient, in<br>comparison with control |                                                              | 36/40 cells<br>normal<br>3 gaps<br>1 break<br>0 exchanges  | 28/40 cells*<br>normal<br>5 gaps<br>11 breaks<br>4 exchanges            | 32/40 cells<br>normal<br>9 gaps<br>1 break<br>0 exchanges | 30/40 cells*<br>normal<br>6 gaps<br>7 breaks<br>3 exchanges | 31/40 cells<br>normal<br>6 gaps<br>2 breaks<br>1 exchange    | 22/40 cells*<br>normal<br>16 gaps<br>6 breaks<br>2 exchanges   | 32/40 cells<br>normal<br>5 gaps<br>1 break<br>2 exchanges | 31/40 cells*<br>normal<br>8 gaps<br>5 breaks<br>1 exchange  |
|                                                   |                                                                                               |                                                              | 23/30 cells<br>normal<br>7 gaps<br>2 breaks<br>0 exchanges | 22/30 cells <sup>n</sup><br>normal<br>6 gaps<br>5 breaks<br>2 exchanges |                                                           |                                                             | 46/60 cells<br>normal<br>10 gaps<br>6 breaks<br>3 exchanges  | 33/60 cells*<br>normal<br>23 gaps<br>10 breaks<br>6 exchanges  |                                                           |                                                             |
|                                                   |                                                                                               |                                                              |                                                            |                                                                         |                                                           |                                                             | 77/100 cells<br>normal<br>16 gaps<br>8 breaks<br>4 exchanges | 55/100 cells*<br>normal<br>39 gaps<br>16 breaks<br>8 exchanges |                                                           |                                                             |
| <b>HN2</b><br>(10 <sup>-8</sup> M) <sup>b</sup>   | Reported abnormal <sup>d</sup><br>in clinical test for patient, in<br>comparison with control |                                                              | 40/40 cells<br>normal<br>0 gap<br>0 break<br>0 exchanges   | 27/40 cells*<br>normal<br>9 gaps<br>8 breaks<br>2 exchanges             | 37/40 cells<br>normal<br>2 gaps<br>1 break<br>0 exchanges | 29/40 cells*<br>normal<br>8 gaps<br>2 breaks<br>6 exchanges | NA <sup>f</sup>                                              | 35/40 cells*<br>normal<br>2 gaps<br>3 breaks<br>0 exchanges    | 36/40 cells<br>normal<br>1 gap<br>1 break<br>2 exchanges  | 26/40 cells*<br>normal<br>8 gaps<br>5 breaks<br>3 exchanges |
|                                                   |                                                                                               |                                                              | 27/30 cells<br>normal<br>0 gap<br>4 breaks<br>0 exchanges  | 25/30 cells <sup>n</sup><br>normal<br>2 gaps<br>4 breaks<br>0 exchanges |                                                           |                                                             | NA <sup>f</sup>                                              | 54/60 cells*<br>normal<br>2 gaps<br>5 breaks<br>0 exchanges    |                                                           |                                                             |
|                                                   |                                                                                               |                                                              |                                                            |                                                                         |                                                           |                                                             | NA <sup>f</sup>                                              | 89/100 cells*<br>normal<br>4 gaps<br>8 breaks<br>0 exchanges   |                                                           |                                                             |

<sup>a</sup> Drug used for DNA breakage, <sup>b</sup> Concentration of drug, <sup>c</sup> Numbers of cells normal and numbers of cells with gaps, breaks and exchanges <sup>d,f</sup> Details not available <sup>e</sup> Not done \* Breakage level increases after drug treatment but not to the levels observed in Fanconi anemia patients. <sup>n</sup> No difference between the cells of the patient and the control

**Supplemental Table 3** Detailed chromosomal aberrations in lymphocyte cells. Chromosomal aberrations, with the number of normal cells, and numbers of gaps, breaks and exchanges in total cells and in control cells included in the same experiment, after treatment with DEB, MMC and H2N.

**A**

| Gene    | Sequence analyzed | Variation | Region | Ref dbSNP database | AF <sup>a</sup> | Status         |
|---------|-------------------|-----------|--------|--------------------|-----------------|----------------|
| TACC1   | cDNA              | G/A       | coding | rs2013586          | ND              | S <sup>b</sup> |
| PLEKHA2 | cDNA              | C/-       | 5'UTR  | rs76319743         | ND              | -              |
| ADAM9   | cDNA              | C/T       | coding | rs61753674         | 0.013           | S              |
| ADAM32  | gDNA              | C/T       | 5'UTR  | rs59118660         | 0.4547          | -              |
| IDO2    | gDNA              | (-/A)     | 3'UTR  | rs78742566         | 0.056           | -              |
| IDO2    | gDNA              | A/T       | 3'UTR  | rs33976899         | ND              | -              |
| ANK1    | gDNA              | C/T       | coding | rs1137177          | 0.194           | S              |
| ANK1    | gDNA              | C/T       | coding | rs2304880          | 0.181           | S              |
| ANK1    | gDNA              | G/C       | coding | rs504574           | 0.389           | S              |
| AP3M2   | cDNA              | T/A       | coding | rs1050263          | ND              | C>S            |
| AP3M2   | cDNA              | C/T       | coding | rs1050264          | ND              | L>F            |
| HGSNAT  | cDNA              | T/C       | coding | rs1126058          | ND              | S              |

<sup>a</sup> Allele frequency <sup>b</sup> Synonymous ND : Not determined

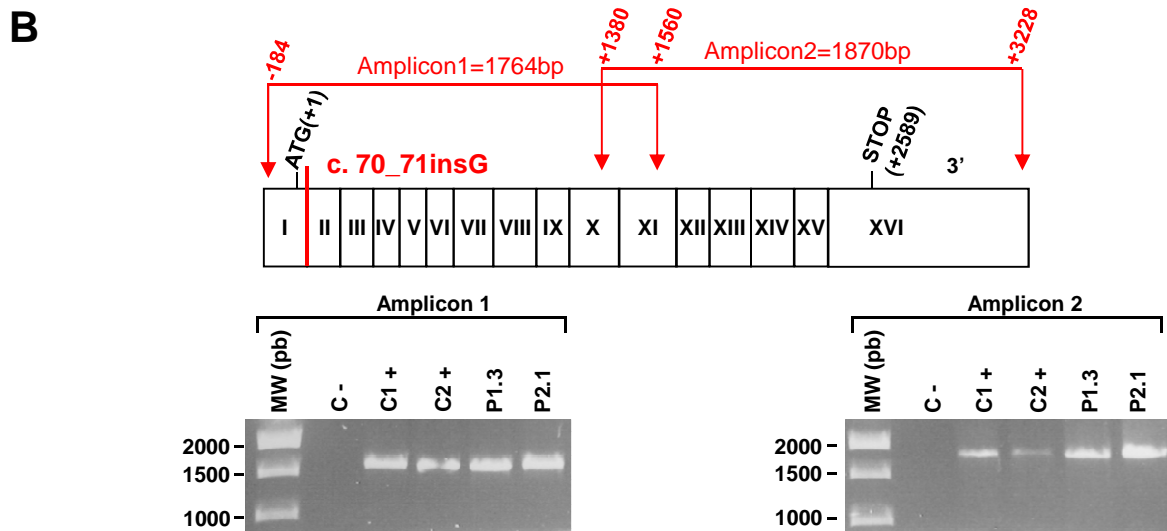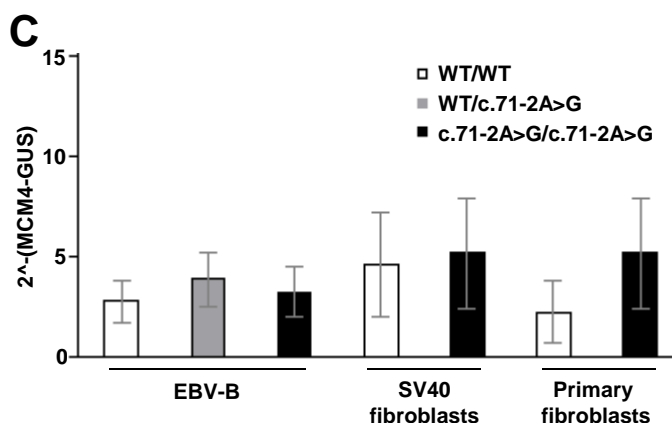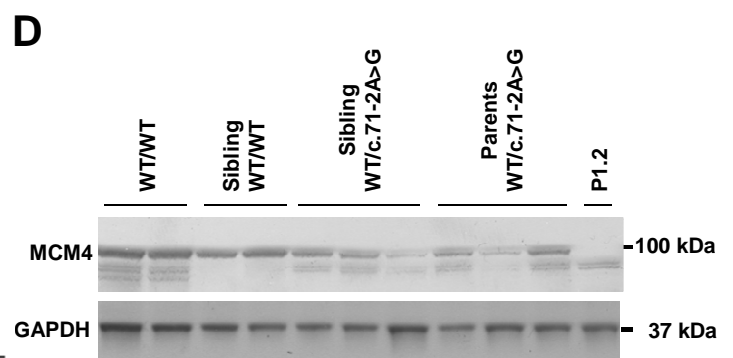

**Supplemental Figure 1 (A)** Table of all variants (other than the causal *MCM4* variant) identified in the coding region, splicing site and the 5' and 3'UTRs of all coding genes and one miRNA located in the centromeric region of chromosome 8. **(B)** Amplification of the *MCM4* cDNA as two fragments. Schematic diagram of the *MCM4* cDNA, showing the binding sites of the primers and the size of the amplification products. Amplification of the *MCM4* cDNA from SV40 fibroblasts with various primer pairs for controls and patients. **(C)** Relative quantification of *MCM4* mRNA in EBV-B cells from P1.2, family members (n=7, 2 WT/WT, 5 WT/c.71-2A>G) and controls (n=2) and SV40-fibroblasts and primary fibroblasts from P1.3, P2.1 and controls (n=2). We used only probes specific for *MCM4* mRNA. GUS was used as endogenous gene for comparison. The ratio of *MCM4* to GUS mRNA levels is shown. Error bars indicate the standard deviation. **(D)** MCM4 was detected with a polyclonal antibody, at a size of 100 kDa, in total extracts of EBV-B cells from P1.2, WT/WT family members (n=2), WT/c.71-2A>G family members (n=6) and controls (n=2). An antibody against GAPDH was used as a protein loading control.

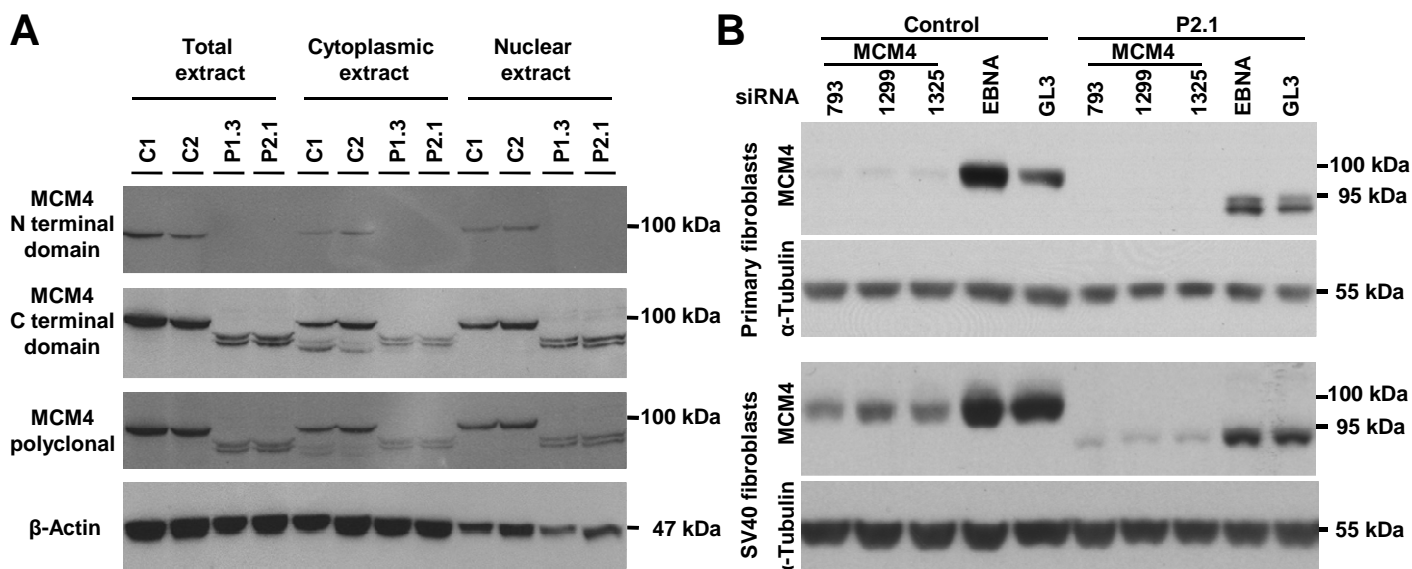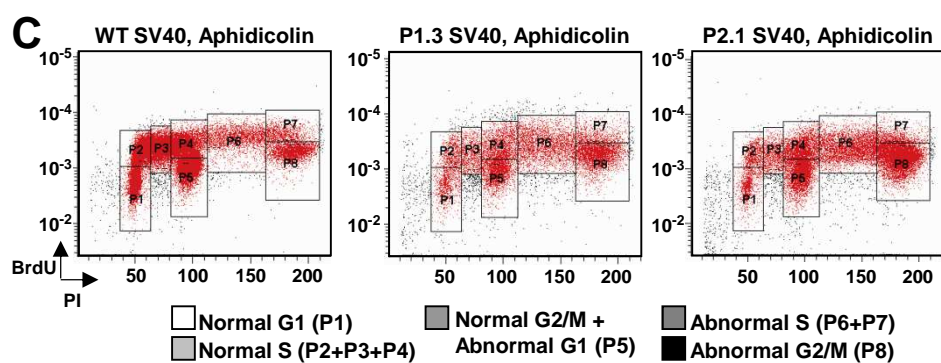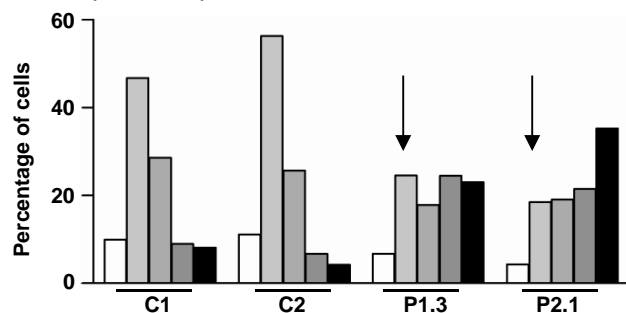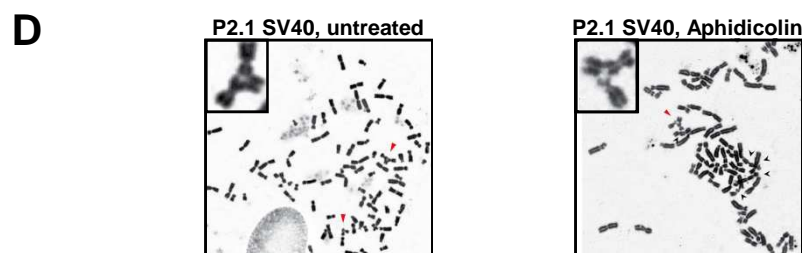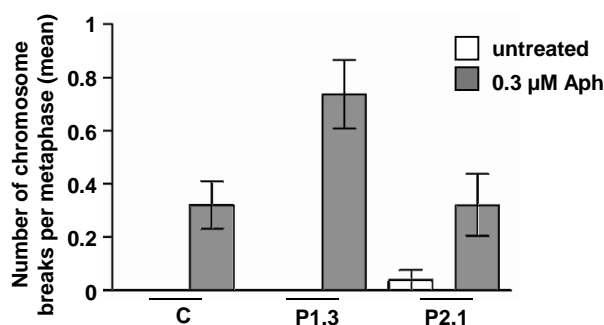

**Supplemental Figure 2 (A)** MCM4 protein production in SV40-fibroblasts from controls, P1.3 and P2.1 was assessed by western blotting with a polyclonal antibody against the N-terminal domain or the C-terminal domain of MCM4 and a polyclonal antibody against the first 300 amino acids of the MCM4 protein.  $\beta$ -actin antibody was used as a protein loading control. **(B)** MCM4 protein levels after transient transfection with 3 different siRNAs against MCM4 in primary and SV40-fibroblasts from controls and P1.3 assessed by western blotting. Transient transfection with the control siRNAs (EBNA and GL3) was used as a negative control. Total protein extracts from controls and P1.3 primary and SV40-fibroblasts were used as a positive control for the antibody.  $\alpha$ -Tubulin antibody was used as a loading control. **(C)** Cell cycle of SV40-fibroblasts from controls and patients after treatment with 0.3  $\mu$ M Aph. Representative flow cytometry plots. Control (left), P1.3 (middle) and P2.1 (right) after Aph treatment. P1 corresponds to normal G1 phase, P2+P3+P4 correspond to normal S phase, P5 corresponds to normal G2 phase plus abnormal G1 or failed mitosis, P6+P7 correspond to re-replication S phase and P8 corresponds to 8C DNA content. The patients' SV40-fibroblasts had a lower proportion of BrdU-positive cells at S phase than the control cells **(D)** Representative spreads of chromosome breaks induced in the presence or absence of APH. A P2.1 metaphase with some aberrations indicated by arrows (left) and a P2.1 metaphase with aphidicolin-induced breaks indicated by arrows (right). The number of chromosome breaks (mean) per metaphase in P1.3 and P2.1 primary fibroblasts was not significantly different from that in control primary fibroblasts. Error bars indicate SEM.

Serine/threonine-rich domain

|                                      |             |            |          |        |
|--------------------------------------|-------------|------------|----------|--------|
|                                      | 1           | 51         | 75       | 83     |
| <i>Homo sapiens</i>                  | -MSSPASTP   | RRRGRATPAQ | TPR---SE | DARS   |
| <i>Pan troglodytes</i>               | -MSSPASTP   | RRRGRATPAQ | TPR---SE | DARS   |
| <i>Gorilla gorilla</i>               | -CVTQA----- | -----R-    | -----    | -----  |
| <i>Pongo pygmaeus</i>                | -MSSPASTP   | RRRGRATPAQ | TPR---SE | DARS   |
| <i>Macaca mulatta</i>                | -MSSPASTP   | RRRGRATPAQ | TPR---SE | DARS   |
| <i>Callithrix jacchus</i>            | -MSSPASTP   | RRRGRATPAQ | TPR---SE | DARS   |
| <i>Microcebus murinus</i>            | -MSSPASTP   | RRRGRATPAQ | TPR---SE | DARS   |
| <i>Spermophilus tridecemlineatus</i> | -MSSPAS-    | PSRR-SR    | RRRTT    | PAQTPR |
| <i>Upata belangeri</i>               | -MSSPASTP   | RRRGRATPAQ | TPR---SE | DARS   |
| <i>Equus caballus</i>                | -MSSPASTP   | RRRGRATPAQ | TPR---SE | DAKS   |
| <i>Oryzomys gameti</i>               | -MSSPASTP   | RRRGRATPAQ | TPR---SE | DARS   |
| <i>Dipodomys ordii</i>               | -MSSPASTP   | RRRGRATPAQ | TPR---SE | DARS   |
| <i>Oryctolagus cuniculus</i>         | -MSSPASTP   | RRRGRATPAQ | TPR---SE | DARS   |
| <i>Cavia porcellus</i>               | -MSSPASTP   | RRRGRATPAQ | TPR---SE | DARS   |
| <i>Peropus vancouveris</i>           | -MSSPASTP   | RRRGRATPAQ | TPR---SE | DARS   |
| <i>Felis catus</i>                   | -MSSPASTP   | RRRGRATPAQ | TPR---SE | DARS   |
| <i>Myotis lucifugus</i>              | -MSSPASTP   | RRRGRATPAQ | TPR---SE | DARS   |
| <i>Canis familiaris</i>              | -MSSPASTP   | RRRGRATPAQ | TPR---SE | DARS   |
| <i>Mus musculus</i>                  | -MSSPASTP   | RRRGRATPAQ | TPR---SE | DARS   |
| <i>Eriacus europaeus</i>             | -MSSPASTP   | RRRGRATPAQ | TPR---SE | DARS   |
| <i>Rattus norvegicus</i>             | -MSSPASTP   | RRRGRATPAQ | TPR---SE | DARS   |
| <i>Dasylops novemcinctus</i>         | -MSSPASTP   | RRRGRATPAQ | TPR---SE | DARS   |
| <i>Loxodonta africana</i>            | -MSSPASTP   | RRRGRATPAQ | TPR---SE | DARS   |
| <i>Ochotona princeps</i>             | -MSSPASTP   | RRRGRATPAQ | TPR---SE | DARS   |
| <i>Procyon canisculus</i>            | -MSSPASTP   | RRRGRATPAQ | TPR---SE | DARS   |
| <i>Echinops telfairi</i>             | -MSSPASTP   | RRRGRATPAQ | TPR---SE | DARS   |
| <i>Monodelphis domestica</i>         | -MSSPASTP   | RRRGRATPAQ | TPR---SE | DARS   |
| <i>Omitridhynchus anatinus</i>       | -MSSPASTP   | RRRGRATPAQ | TPR---SE | DARS   |
| <i>Bos taurus</i>                    | -MSSPASTP   | RRRGRATPAQ | TPR---SE | DARS   |
| <i>Sus scrofa</i>                    | -MSSPASTP   | RRRGRATPAQ | TPR---SE | DARS   |
| <i>Macropus eugenii</i>              | -MSSPASTP   | RRRGRATPAQ | TPR---SE | DARS   |
| <i>Gallus gallus</i>                 | -MSSPASTP   | RRRGRATPAQ | TPR---SE | DARS   |
| <i>Taeniopygia guttata</i>           | -MSSPASTP   | RRRGRATPAQ | TPR---SE | DARS   |
| <i>Anolis carolinensis</i>           | -MSSPASTP   | RRRGRATPAQ | TPR---SE | DARS   |
| <i>Xenopus tropicalis</i>            | -MSSPASTP   | RRRGRATPAQ | TPR---SE | DARS   |
| <i>Danio rerio</i>                   | -MSSPASTP   | RRRGRATPAQ | TPR---SE | DARS   |
| <i>Labiagu nubiopes</i>              | -MSSPASTP   | RRRGRATPAQ | TPR---SE | DARS   |
| <i>Gasterosteus aculeatus</i>        | -MSSPASTP   | RRRGRATPAQ | TPR---SE | DARS   |
| <i>Tetraodon nigroviridis</i>        | -MSSPASTP   | RRRGRATPAQ | TPR---SE | DARS   |
| <i>Oryzias latipes</i>               | -MSSPASTP   | RRRGRATPAQ | TPR---SE | DARS   |
| <i>Labiagu nubiopes</i>              | -MSSPASTP   | RRRGRATPAQ | TPR---SE | DARS   |
| <i>Ciona intestinalis</i>            | -MSSPASTP   | RRRGRATPAQ | TPR---SE | DARS   |
| <i>Ciona savignyi</i>                | -MSSPASTP   | RRRGRATPAQ | TPR---SE | DARS   |
| <i>Drosophila melanogaster</i>       | -MSSPASTP   | RRRGRATPAQ | TPR---SE | DARS   |
| <i>Caenorhabditis elegans</i>        | -MSSPASTP   | RRRGRATPAQ | TPR---SE | DARS   |
| <i>Saccharomyces cerevisiae</i>      | -MSSPASTP   | RRRGRATPAQ | TPR---SE | DARS   |

**Supplemental Figure 3** The N-terminal domain of the MCM4 protein in humans and the corresponding region in 45 other eukaryotic species. Conservation of the first 83 amino acids of the MCM4 protein, with the position of the three ATG codons in frame.

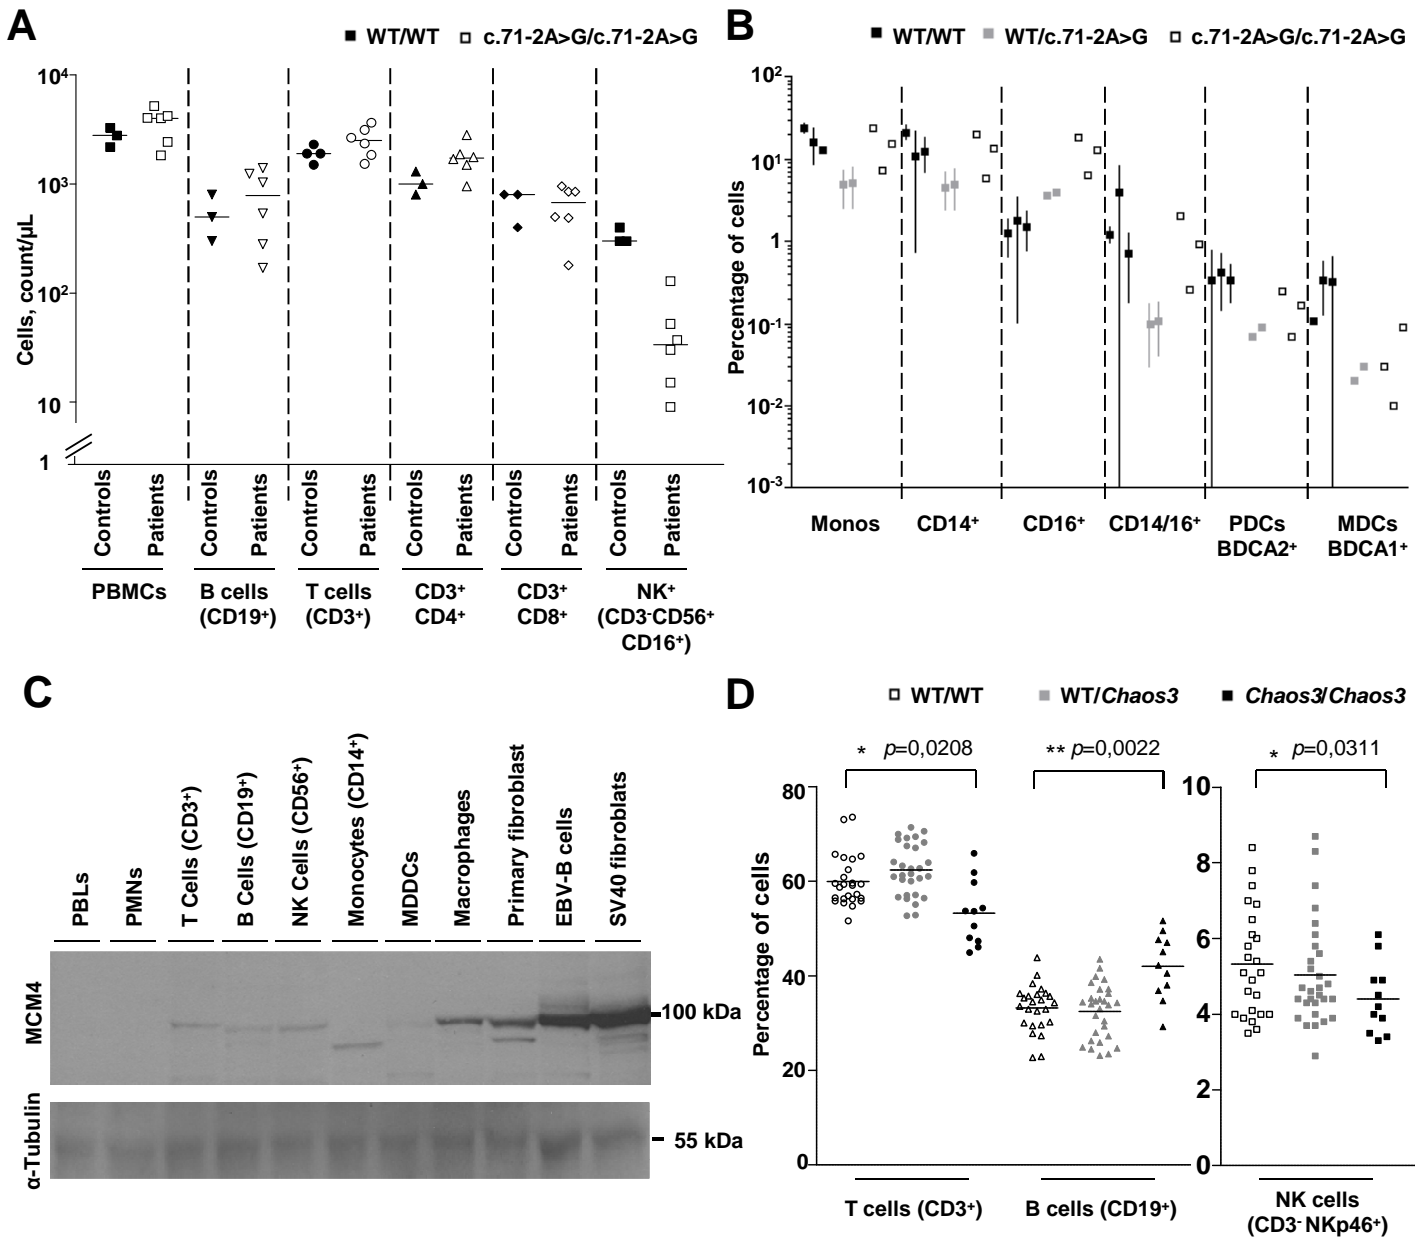

**Supplemental Figure 4** Hematopoietic cell phenotypes in humans and mice (A) Flow cytometry for lymphocyte subsets: B cells (CD3<sup>+</sup>, CD3<sup>+</sup>CD4<sup>+</sup>, CD3<sup>+</sup>CD8<sup>+</sup>) and NK cells were detected in the peripheral blood of controls and patients (P1.1, P1.2, P1.3 P1.4, P1.5 and P2.1). Horizontal bars represent medians. (B) Flow cytometry for monocyte subsets: CD14<sup>+</sup>, CD16<sup>+</sup>, CD14/16<sup>+</sup> and PDCsBDCA2<sup>+</sup> and MDCsBDCA1<sup>+</sup> cells were detected in the peripheral blood of controls of various age groups (5 to 10 y, 10 to 15 y and >15 y), heterozygous subjects and homozygous patients (P1.1, P1.2 and P1.3). Error bars for the controls indicate the standard deviation. (C) MCM4 was detected with a polyclonal antibody, at a size of 100 kDa, in cell subsets from blood (PBLs, PMNs, T cells, B cells, NK cells, monocytes, MDDCs and macrophages), EBV-B cells, primary and SV40 fibroblast cells from a control individual. An antibody against  $\alpha$ -tubulin was used as a loading control. This result is representative of 3 independent experiments). (D) NK cell percentage in WT/WT, *Chaos3*/WT, *Chaos3*/*Chaos3* mice. The percentage of NK cells is significantly lower in *Chaos3*/*Chaos3* (n=11) than in WT/WT (n=25) mice ( $P < 0.05$  indicated by \*, non parametric Wilcoxon test). Horizontal bars indicate the means. The percentage of B cells is significantly higher in *Chaos3*/*Chaos3* (n=11) than in WT/WT (n=25) mice ( $P < 0.005$  indicated by \*\*, non parametric Wilcoxon test). A significant difference in the percentage of T cells was observed between WT/WT (n=19) and *Chaos3*/*Chaos3* (n=11) mice ( $P < 0.05$  indicated by \*, non parametric Wilcoxon test).



**A**

| Cell Subsets                             | Sibling<br>WT/WT | Sibling<br>WT/c.71-2A>G |    | P1.1<br>c.71-2A>G/c.71-2A>G | P1.2 | P1.3 | Normal<br>range |
|------------------------------------------|------------------|-------------------------|----|-----------------------------|------|------|-----------------|
| T-CD3 <sup>+</sup> (%)                   | 69               | 73                      | 77 | 76                          | 76   | 67   | 56-84           |
| T-CD4 <sup>+</sup> (%)                   | 38               | 47                      | 41 | 54                          | 34   | 43   | 31-52           |
| CD4 <sup>+</sup> CD45RA <sup>+</sup> (%) | 26               | ND <sup>a</sup>         | 22 | 66                          | 39   | 29   | 20-86           |
| CD4 <sup>+</sup> CD45RO <sup>+</sup> (%) | 74               | ND                      | 87 | 34                          | 64   | 71   | 29-63           |
| T-CD8 <sup>+</sup> (%)                   | 26               | 23                      | 26 | 21                          | 26   | 22   | 18-35           |
| CD8 <sup>+</sup> CD45RA <sup>+</sup> (%) | 65               | 47                      | 78 | 68                          | 29   | 34   | 40-80           |
| CD8 <sup>+</sup> CD45RO <sup>+</sup> (%) | 39               | 49                      | 75 | 33                          | 71   | 73   | 12-43           |
| B-CD19 <sup>+</sup> (%)                  | 14               | 14                      | 16 | 23                          | 20   | 30   | 6-23            |
| CD19 <sup>+</sup> CD27 <sup>+</sup> (%)  | 11               | 16                      | 21 | 4                           | 10   | 5    | >10             |

<sup>a</sup> Not Done**B**

| Stimulus<br>3 days culture | Sibling<br>WT/WT | Sibling<br>WT/c.71-2A>G |     | P1.1<br>c.71-2A>G/c.71-2A>G | P1.2 | P1.3 | Normal<br>range |
|----------------------------|------------------|-------------------------|-----|-----------------------------|------|------|-----------------|
| Medium                     | 0.1              | 0.1                     | 0.1 | 0.25                        | 0.15 | 0.3  |                 |
| PHA                        | 179              | 78.5                    | 98  | 100                         | 43.5 | 97   | >50             |

\* Cpm/10\*3

**C**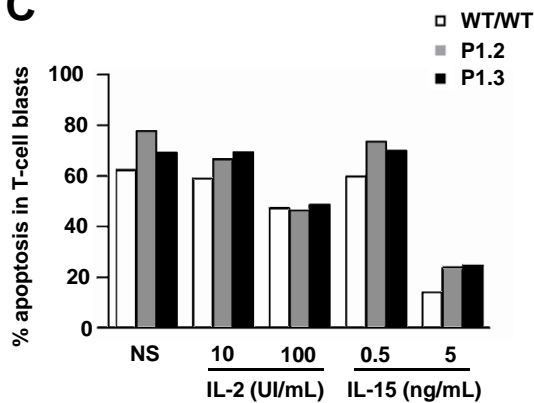**D**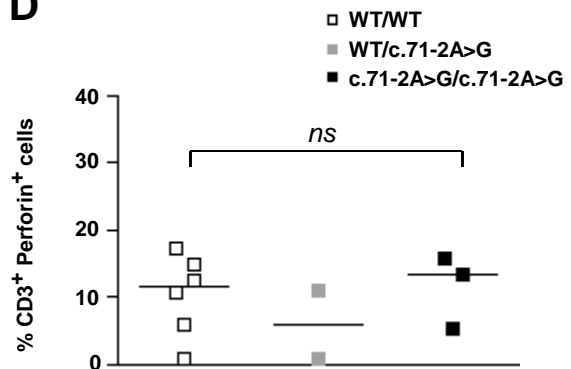

**Supplemental Figure 5** T-cell phenotypes and stimulation responses (A) Percentage of different T- and B-cell subsets in whole-blood samples from healthy siblings either homozygous WT or heterozygous, and patients. (B) Proliferation of PBMCs determined by thymidine incorporation from healthy homozygous WT or heterozygous siblings and patients were not stimulated (medium) or were stimulated with PHA (2.5 mg/ml) over 3 days. (C) Apoptosis of PHA-activated T-cell blasts from a control, P1.2 and P1.3 was assessed by determining propidium iodide staining in the presence or absence of stimulation with various doses of IL-2 or IL-15 over 3 days. (D) Flow cytometry counts of CD3<sup>+</sup>Perforin<sup>+</sup> T cells for controls (n=6), heterozygous siblings (n=2) and patients (P1.1, P1.2 and P1.3). Horizontal bars indicate medians. A non significant difference ( $P>0.05$ ) is indicated by "ns".

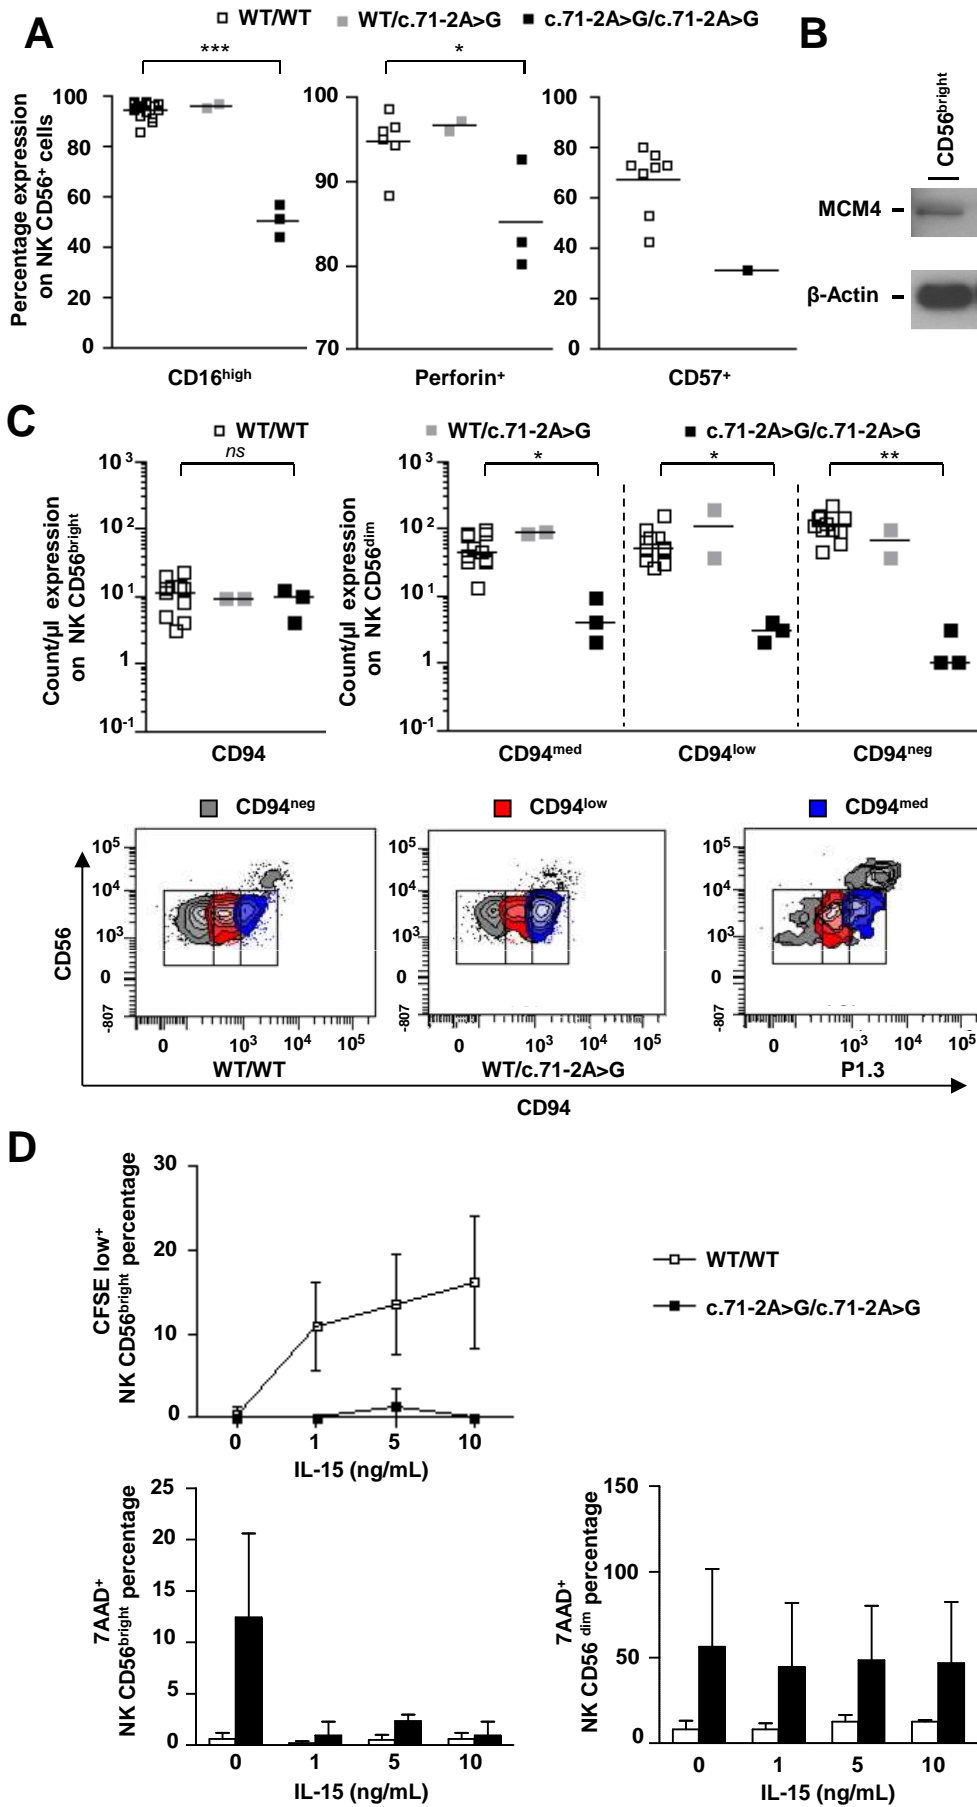

### Supplemental Figure 6

Homozygous *MCM4* mutation and specific NK CD56<sup>dim</sup> deficiency. (A) Flow cytometry counts of CD56<sup>+</sup> NK cells that were also CD16<sup>+</sup>, for controls (n=17), heterozygous siblings (n=2) and patients (P1.1, P1.2 and P1.3), Perforin<sup>+</sup> for controls (n=6), heterozygous siblings (n=2) and patients (P1.1, P1.2 and P1.3) and CD57<sup>+</sup> for controls (n=8) and patient P1.3. Horizontal bars indicate medians. A significant  $P < 0.05$  is indicated by \*, a  $P < 0.005$  is indicated by \*\* and a  $P < 0.0005$  by \*\*\*, in Student's *t*-test. (B) MCM4 was detected with a polyclonal antibody, at a size of 100 kDa, in nuclear extract from the CD56<sup>bright</sup> and CD56<sup>dim</sup> NK cell subsets of control blood. An antibody against β-actin was used as a protein loading control. The ratio of MCM4 to β-actin protein levels is shown for 3 independent controls from independent experiments. Error bars indicate the standard deviation. (C) Flow cytometry counts of the two subsets of CD56<sup>+</sup> NK cells expressing CD94 in controls (n=11), heterozygous siblings (n=2) and patients (P1.1, P1.2 and P1.3). Horizontal bars indicate medians.  $P < 0.05$  is indicated by \*, a  $P < 0.005$  is indicated by \*\* and a non significant difference ( $P > 0.05$ ) by "ns". Representative flow cytometry plots of a homozygous WT sibling, a heterozygous sibling and one patient. (D) PBMCs from healthy controls (n=6) and from one patient (P1.3) tested in two independent experiments were stained with CFSE and stimulated for 72 h with various doses of IL-15. Apoptosis was assessed on NK subsets, by 7AAD staining. Error bars indicate the standard deviation.
